# Supplementary material for: RTB Lectin: a novel receptor-independent delivery system for lysosomal enzyme replacement therapies
Source: PubMed Central journal article supplement (PMC4585660; doi:10.1038/srep14144), 2015-09-18
Supplement: srep14144-s1.pdf [file srep14144-s1.pdf]

## SUPPLEMENTARY MATERIAL

### **RTB Lectin: a novel receptor-independent delivery system for lysosomal enzyme replacement therapies**

**Walter Acosta<sup>1,4</sup>, Jorge Ayala<sup>1,3</sup>, Maureen C. Dolan<sup>1,2</sup> & Carole L. Cramer<sup>1-3</sup>**

<sup>1</sup>Arkansas Biosciences Institute at Arkansas State University-Jonesboro, PO Box 639, State University, AR 72467, USA.

<sup>2</sup>Department of Biological Sciences, Arkansas State University-Jonesboro, State University AR 72467, USA.

<sup>3</sup>BioStrategies LC, PO Box 2428, State University, AR 72467, USA.

<sup>4</sup>Present address: BioStrategies LC, PO Box 2428, State University, AR 72467, USA.

Correspondence should be addressed to C.L.C. ([ccramer@astate.edu](mailto:ccramer@astate.edu)).

**Supplementary Figure S1. RTB:IDUA protein purity.** After size exclusion, purified protein (1µg, measured by A<sub>280</sub>) was size-separated by SDS-PAGE and Coomassie stained following manufacture instructions (Thermo). A single band of 120 kDa was detected (A). Percentage of purity was further confirmed at 98.3% using an automated electrophoresis station BioRad Experion® Pro260 chip following manufacturer's procedures (B).

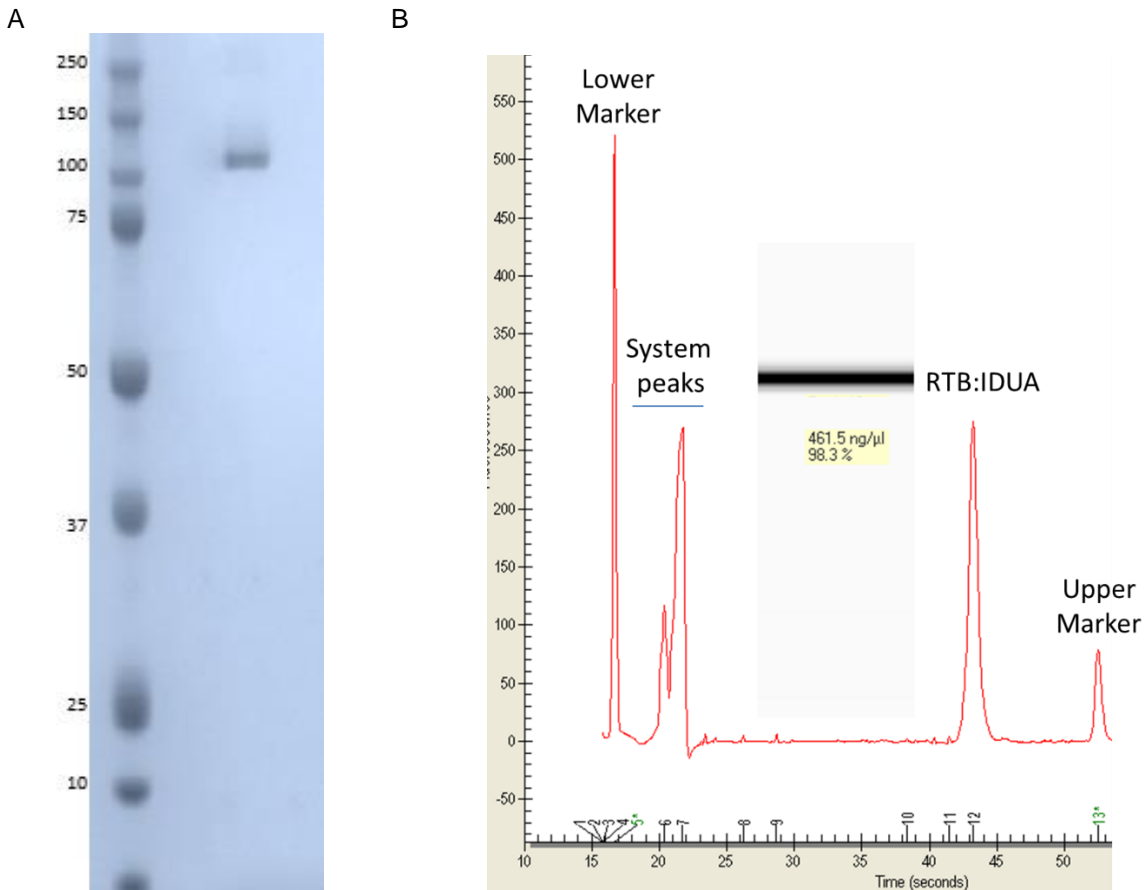

**Supplementary Figure S2. RTB:IDUA protein identification.** Purified protein detected by Coomassie staining (e.g., Fig. S1) was analyzed at University of Arkansas for Medical Science Proteomics Core by in-gel trypsin digestion and tandem mass spectrometry (MS/MS). Excluding the patatin signal peptide, there is a 37% coverage (334/895) of the sequence encompassing 32 exclusive unique peptides and 46 exclusive unique spectra.

Patatin Signal Peptide

|            |           |             |        |          |         |            |            |            |            |            |             |            |            |            |            |         |       |       |     |       |       |
|------------|-----------|-------------|--------|----------|---------|------------|------------|------------|------------|------------|-------------|------------|------------|------------|------------|---------|-------|-------|-----|-------|-------|
| MATTKSFLIL | FFMILATTS | TCATSR      | ADVC   | MDPEPIVR | IV      | GRNGLCVDVR | DGRFHNGNAI | QLWPCK     | SNTD       | ANQLWTLKR  | NTIRSNKGKCL |            |            |            |            |         |       |       |     |       |       |
| TTYGYS     | SPGVY     | VMIIYDCNTAA | TDATR  | WQIWD    | NGTI    | INPRSS     | LVLAATSGNS | GTTTLTVQTN | I          | YAVSQGWLPT | NNTQPFVTTI  | VGLYGLCLQA |            |            |            |         |       |       |     |       |       |
| NSGQVWI    | EDC       | SSEK        | AEQQA  | LYADGS   | IRPQ    | QNRDNC     | LTSD       | SNIRETVVK  | I          | LSCGPASSGQ | RWMFKNDGTI  | LNLYSGLVLD | VRASDPSLKQ |            |            |         |       |       |     |       |       |
| IILYPL     | HGDP      | NQIWLPLFEA  | PHLVQV | DAAR     | ALWPLRR | FWR        | STGFCPP    | PLP        | H          | SOADQYVLSW | DQQLNLAYVG  | AVPHRGIKQV | RTHWLELVT  |            |            |         |       |       |     |       |       |
| TRGSTGR    | GLS       | YNFTHLDGYL  | DLLENQ | LLP      | GFELMGS | ASG        | HFTDFEDK   | QQ         | VFEWKDLVSS | LARRYIGRYG | LAHVS       | KWNFE      | TWNEPDHDF  |            |            |         |       |       |     |       |       |
| DNVSM      | TMOGF     | LNYYDACSEG  | LRAAS  | PALRL    | GGPGDS  | FHTP       | PRSPLS     | WGLL       | RHCHDGTNFF | TGEAGVR    | LDY         | ISLHRK     | GARS       | SISILEQEKV |            |         |       |       |     |       |       |
| VAQQIR     | QLFP      | KFADTPI     | YND    | EADPLV   | QWSL    | PPWRAD     | VTY        | AAAVK      | VI         | AO         | HQNLL       | LANTT      | SAFPY      | ALLSN      | DNAFLSYHHP | PFAQRTL | TAR   |       |     |       |       |
| FQVNN      | TRPPH     | VQLLR       | KPVL   | T        | AMGLL   | ALLDE      | EQLWAE     | VSOA       | GTVLD      | SNHTV      | GVLAS       | AHRPQ      | GPAD       | AWRAV      | LIYASD     | DTRA    | HPNRS | VAVTL |     |       |       |
| RLRGV      | PPPG      | LVYV        | TRYLDN | GLCS     | PDGEWR  | RLGR       | PVFP       | TA         | EQFR       | RRAE       | DPVAA       | APRPL      | PAGGR      | L          | LRP        | ALR     | LP    | SL    | LLV | HVCAR | PEKPP |
| LEVPVPR    | GPP       | SPGN        | PHHHH  | H        | W       | TYEIQ      | FSD        | GKAYT      | PVSRK      | PSTFN      | LVFVS       | PDTG       | AVS        | GSY        | RVR        | ALDY    | WAR   | PGFFS | DPV | PY    |       |
